# Supplementary material
Source: PubMed Central journal article supplement (PMC5824205)
Supplement: jamaoncol-3-659-s001.pdf [file jamaoncol-3-659-s001.pdf]

## Supplementary Online Content

Iqbal J, Amir E, Rochon PA, Giannakeas V, Sun P, Narod SA. Association of the timing of pregnancy with survival in women with breast cancer. *JAMA Oncol*. Published online March 9, 2017. doi:10.1001/jamaoncol.2017.0248

**eTable 1.** Details of Health Administrative Databases

**eTable 2.** Exclusion of Patients

**eTable 3.** Coding Details of Exposures (Pregnancy, Abortion, and Live Birth/Stillbirth) and Treatment

**eTable 4.** Characteristics of Women in the Study Population

**eTable 5.** Parity of Women From 5 Years Prior to 5 Years After Breast Cancer Diagnosis

**eTable 6.** Characteristics of Women in the Study Population According to the Exposure Groups

**eTable 7.** Cox Proportional Hazard Model to Estimate the Hazard Ratio (HR) of All-Cause Mortality for Women Who Had Pregnancy; No Chemotherapy

**eTable 8.** Cox Proportional Hazard Model to Estimate the Hazard Ratio (HR) of All-Cause Mortality for Women who had Pregnancy; No Radiotherapy

**eTable 9.** Cox Proportional Hazard Model to Estimate the Hazard Ratio (HR) of All-Cause Mortality for Women Who Had Pregnancy; No Chemotherapy; No Radiotherapy

**eTable 10.** Cox Proportional Hazard Model to Estimate the Hazard Ratio (HR) of All-Cause Mortality for Women Who Had an Abortion

**eTable 11.** Time-Dependent Adjusted Hazard Ratio of All-Cause Mortality for Women Who Had a Live Birth or Stillbirth

**eTable 12.** Cox Proportional Hazard Model to Estimate the Hazard Ratio (HR) of All-Cause Mortality Among Women with Pregnancy-Associated Breast Cancer Who Had a Live Birth or Stillbirth

**eFigure 1.** History of Pregnancy in a Hypothetical Patient

**eFigure 2.** Exposure Groups

**eFigure 3.** Prevalence of Pregnancy in 7,553 Women by the Time From Breast Cancer Diagnosis

**eFigure 4.** Prevalence of Abortion in 7,553 Women by the Time From Breast Cancer Diagnosis

**eFigure 5.** Prevalence of Live Birth in 7,553 Women by the Time From Breast Cancer Diagnosis

**eFigure 6.** Prevalence of Live Birth in 351 Women Age 20-29 Years by the Time From Breast Cancer Diagnosis

**eFigure 7.** Prevalence of Live Birth in 858 Women Age 30-34 Years by the Time From Breast Cancer Diagnosis

**eFigure 8.** Prevalence of Live Birth in 1,992 Women Age 35-39 Years by the Time From Breast Cancer Diagnosis

**eFigure 9.** Prevalence of Live Birth in 4,352 Women Age 40-44 Years by the Time From Breast Cancer Diagnosis

**eFigure 10.** Number of Women at Risk of Death From All Causes in 7,553 Patients by the Time From Breast Cancer Diagnosis

**eFigure 11.** 5-year Overall Survival in Women with Pregnancy-Associated Breast Cancer According to Age Groups at Diagnosis; Unadjusted

This supplementary material has been provided by the authors to give readers additional information about their work.

**eTable 1. Details of Health Administrative Databases <sup>a</sup>**

| <b>Datasets</b>                                            | <b>Description</b>                                                                                                                                                                                                                                               | <b>Clinical Information</b>                                                                                                                                 |
|------------------------------------------------------------|------------------------------------------------------------------------------------------------------------------------------------------------------------------------------------------------------------------------------------------------------------------|-------------------------------------------------------------------------------------------------------------------------------------------------------------|
| Ontario Cancer Registry (OCR)                              | The OCR contains demographic and clinical information on incident cases of cancer in Ontario, as well as information on mortality. The OCR registers all new cases of cancer, except non-melanoma skin cancer.                                                   | Age at breast cancer diagnosis<br>Date of breast cancer diagnosis<br>Pathological stage at diagnosis (American Joint Committee on Cancer)<br>Cause of death |
| Cancer Care Ontario – Collaborative Staging (CCO-CS)       | The Collaborative Staging is the expansion of TNM staging system, and is a part of Cancer Care Ontario’s Stage Capture Project.                                                                                                                                  | Estrogen receptor (ER)<br>Progesterone receptor (PR)<br>ERBB2 receptor                                                                                      |
| New Drug Funding Plan (NDFP)                               | The NDFP is a publicly funded drug program under the Ontario Public Drug Programs (OPDP). The NDFP directly covers the cost of many injectable cancer drugs administered in hospitals and cancer centers.                                                        | ERBB2 receptor<br>Chemotherapy                                                                                                                              |
| Discharge Abstract Database (DAD) & Same Day Surgery (SDS) | The DAD captures administrative, clinical and demographic information on hospital discharges (including deaths, sign-outs and transfers).<br><br>The SDS database collects information about same-day surgeries and procedures in the Province of Ontario.       | Pregnancy (Natural and Assisted Reproductive Technology)<br>Abortion<br>Radiotherapy                                                                        |
| MOMBABY                                                    | The MOMBABY is an ICES-derived dataset linking the admission records of delivering mothers and their newborns.                                                                                                                                                   | Live-birth<br>Stillbirth                                                                                                                                    |
| Ontario Health Insurance Plan (OHIP)                       | The OHIP contains information on claims made by physician and other healthcare providers for insured services provided to residents of the Ontario.                                                                                                              | Pregnancy (Natural and Assisted Reproductive Technology)<br>Abortion<br>Radiotherapy                                                                        |
| National Ambulatory Care Reporting System (NACRS)          | The NACRS contains data for all hospital-based and community-based ambulatory care, including day surgery, outpatient and community-based clinics, and emergency departments. The client visit data is collected at time of service in participating facilities. | Pregnancy (Natural and Assisted Reproductive Technology)<br>Abortion<br>Radiotherapy                                                                        |
| Ontario Registrar General-Death (ORGD)                     | The ORGD is a database of population & demographics, and contains information on vital statistics including death.                                                                                                                                               | Date of death                                                                                                                                               |

<sup>a</sup> Further details at: <https://datadictionary.ices.on.ca/Applications/DataDictionary/Default.aspx>.

**eTable 2.** Exclusion of Patients

| <b>Exclusion</b>                                              | <b>Frequency</b> | <b>Percent</b> |
|---------------------------------------------------------------|------------------|----------------|
| <b>Total</b>                                                  | <b>96,676</b>    | <b>100.00</b>  |
| Non-female/unknown sex/Death date earlier than diagnosis date | 837              | 0.86           |
| Age less than 20 at time of breast cancer                     | 19               | 0.02           |
| Age 45 or greater at time of breast cancer                    | 82,725           | 85.57          |
| History of hysterectomy or oophorectomy                       | 3,164            | 3.27           |
| History of previous cancer (except skin cancers)              | 396              | 0.41           |
| Stage 0 or stage unknown                                      | 1,982            | 2.05           |
| <b>Eligible for study</b>                                     | <b>7,553</b>     | <b>7.81</b>    |

**eTable 3.** Coding Details of Exposures (Pregnancy, Abortion, and Live Birth/Stillbirth) and Treatment

| Discipline | Variable  | Source         | Code(s)                                        | Description                                                             |
|------------|-----------|----------------|------------------------------------------------|-------------------------------------------------------------------------|
| Exposures  | Pregnancy | OHIP Fee codes | A920                                           | MEDICAL MANAGMENT OF EARLY PREGNANCY, INITIAL VISIT                     |
|            |           |                | A921                                           | MEDICAL MANAGEMENT OF EARLY PREGNANCY, SUBSEQUENT VISIT                 |
|            |           |                | P002                                           | High risk prenatal assessment                                           |
|            |           |                | P003                                           | OBS.-PRENATAL CARE-GEN.ASSESS-MAJOR PRENATAL VISIT                      |
|            |           |                | P004                                           | OBS.-PRENATAL CARE-MINOR PRENATAL ASSESS. – SUBSEQ.PRENAT.VIS.          |
|            |           |                | P005                                           | ANTENATAL HEALTH SCREEN                                                 |
|            |           |                | Q605                                           | ANTENATAL PREVENTIVE HEALTH ASSESSMENT – N.P.                           |
|            |           |                | Q606                                           | PRENATAL CARE – GEN. ASSESS – MAJOR PRENATAL VISIT – N.P.               |
|            |           |                | Q607                                           | PRENATAL CARE – MIN. ASSESS – SUBSEQ. PRENATAL VISIT- N.P.              |
|            |           | ICD-9          | V22.0                                          | Supervision of normal first pregnancy                                   |
|            |           |                | V22.1                                          | Supervision of other normal pregnancy                                   |
|            |           |                | V22.2                                          | Pregnant state, incidental                                              |
|            |           |                | V23.41                                         | Pregnancy with history of pre-term labor                                |
|            |           |                | V23.42                                         | Pregnancy with history of ectopic pregnancy                             |
|            |           |                | V23.49                                         | Pregnancy with other poor obstetric history                             |
|            |           |                | V23.5                                          | Supervision of high-risk pregnancy with other poor reproductive history |
|            |           |                | V23.7                                          | Supervision of high-risk pregnancy with insufficient prenatal care      |
|            |           |                | V23.81                                         | Supervision of high-risk pregnancy with elderly primigravida            |
|            |           |                | V23.82                                         | Supervision of high-risk pregnancy with elderly multigravida            |
|            |           |                | V23.83                                         | Supervision of high-risk pregnancy with young primigravida              |
|            |           |                | V23.84                                         | Supervision of high-risk pregnancy with young multigravida              |
|            |           |                | V23.86                                         | Pregnancy with history of in utero procedure during previous pregnancy  |
|            |           |                | V23.89                                         | Supervision of other high-risk pregnancy                                |
|            |           |                | V23.9                                          | Supervision of unspecified high-risk pregnancy                          |
|            |           | V72.42         | Pregnancy examination or test, positive result |                                                                         |
|            |           | CCP            | 02.88                                          | DIAGNOSTIC ULTRASOUND OF GRAVID UTERUS                                  |
|            |           | ICD-10         | Z32.01                                         | Encounter for pregnancy test, result positive                           |
|            |           |                | Z33.1                                          | Pregnant state, incidental                                              |
|            |           | CCI            | 5.AB.01.^                                      | Antepartum care                                                         |
|            |           |                | 5.AB.03.^                                      | Obstetrical ultrasound examinations                                     |

**eTable 3: Cont'd**

| <b>Discipline</b> | <b>Variable</b>                                    | <b>Source</b>  | <b>Code(s)</b> | <b>Description</b>                                                       |
|-------------------|----------------------------------------------------|----------------|----------------|--------------------------------------------------------------------------|
| Exposures         | Pregnancy – Assisted Reproductive Technology (ART) | OHIP Fee codes | G334           | D&T GYNAE.TELEPHONE SUPER.NA SAMEDAY/VISIT(MAX.37 PER CYCLE)             |
|                   |                                                    |                | G367           | D./T. PROC.-GYNAECOLOGY-ARTIFICIAL INSEMINATION                          |
|                   |                                                    |                | E542           | ADD ON CODE TO SERVICES WHEN PERFORMED OUTSIDE HOSPITAL                  |
|                   |                                                    |                | Z718           | FEM.GEN.SYST.FALLOPIAN TUBE-LAPAROSCOPY,OOCYTE RETRIEVAL                 |
|                   |                                                    | ICD-9          | V23.85         | Pregnancy resulting from assisted reproductive technology                |
|                   |                                                    |                | V26.1          | Artificial insemination                                                  |
|                   |                                                    |                | V26.81         | Encounter for assisted reproductive fertility procedure cycle            |
|                   |                                                    |                | V26.82         | Encounter for fertility preservation procedure                           |
|                   |                                                    |                | V59.70         | Egg (oocyte) (ovum) donor, unspecified                                   |
|                   |                                                    |                | V59.71         | Egg (oocyte) (ovum) donor, under age 35,anonymous recipient              |
|                   |                                                    |                | V59.72         | Egg (oocyte) (ovum) donor, under age 35,designated recipient             |
|                   |                                                    |                | V59.73         | Egg (oocyte) (ovum) donor, age 35 and over,anonymous recipient           |
|                   |                                                    |                | V59.74         | Egg (oocyte) (ovum) donor, age 35 and over,designated recipient          |
|                   |                                                    | CCP            | 81.92          | ARTIFICIAL INSEMINATION                                                  |
|                   |                                                    | ICD-10         | O09.81         | Supervision of pregnancy resulting from assisted reproductive technology |
|                   |                                                    |                | Z31.83         | Encounter for assisted reproductive fertility procedure cycle            |
|                   |                                                    |                | Z31.84         | Encounter for fertility preservation procedure                           |
|                   |                                                    |                | Z31.89         | Encounter for other procreative management                               |
|                   |                                                    |                | Z31.9          | Encounter for procreative management, unspecified                        |
|                   |                                                    |                | Z52.810        | under age 35, anonymous recipient                                        |
|                   |                                                    |                | Z52.811        | under age 35, designated recipient                                       |
|                   |                                                    |                | Z52.812        | age 35 and over, anonymous recipient                                     |
|                   |                                                    |                | Z52.813        | age 35 and over, designated recipient                                    |
|                   |                                                    |                | Z52.819        | unspecified                                                              |
|                   |                                                    | CCI            | 1.RB.57.^A     | Extraction, ovary                                                        |
|                   |                                                    |                | 1.RB.58.^A     | Procurement, ovary                                                       |
|                   |                                                    |                | 1.RM.83.^A     | Transfer, uterus and surrounding structures                              |
|                   |                                                    |                | 1.RZ.12.^A     | Therapy, female genital tract NEC                                        |
|                   |                                                    |                | 1.ZZ.35.HA-I5  | Progestogens, Estrogens, Androgens, Clomiphene, Danazol                  |
|                   |                                                    |                | 1.ZZ.35.YA-I5  | Progestogens, Estrogens, Androgens, Clomiphene, Danazol                  |

**eTable 3: Cont'd**

| Discipline | Variable              | Source | Code(s)                                                            | Description                                                           |                                 |
|------------|-----------------------|--------|--------------------------------------------------------------------|-----------------------------------------------------------------------|---------------------------------|
| Exposures  | Abortion <sup>a</sup> | ICD-9  | 630-639                                                            | Ectopic And Molar Pregnancy And Other Pregnancy With Abortive Outcome |                                 |
|            |                       |        | 630                                                                | Hydatidiform mole                                                     |                                 |
|            |                       |        | 631                                                                | Other abnormal product of conception                                  |                                 |
|            |                       |        | 632                                                                | Missed abortion                                                       |                                 |
|            |                       |        | 633                                                                | Ectopic pregnancy                                                     |                                 |
|            |                       |        | 634                                                                | Spontaneous abortion                                                  |                                 |
|            |                       |        | 635                                                                | Legally induced abortion                                              |                                 |
|            |                       |        | 636                                                                | Illegal abortion                                                      |                                 |
|            |                       |        | 637                                                                | Unspecified abortion                                                  |                                 |
|            |                       |        | 638                                                                | Failed attempted abortion                                             |                                 |
|            |                       | 639    | Complications following abortion and ectopic and molar pregnancies |                                                                       |                                 |
|            |                       | CCP    | 78.52                                                              | SALPINGECTOMY (PARTIAL) WITH REMOVAL OF TUBAL PREGNANCY               |                                 |
|            |                       |        | 81.0                                                               | DILATION AND CURETTAGE (OF UTERUS)                                    |                                 |
|            |                       |        | 81.01                                                              | DILATION AND CURETTAGE FOLLOWING DELIVERY OR ABORTION                 |                                 |
|            |                       |        | 81.09                                                              | OTHER DILATION AND CURETTAGE                                          |                                 |
|            |                       |        | 81.21                                                              | REMOVAL OF INTRALIGAMENOUS ECTOPIC PREGNANCY                          |                                 |
|            |                       |        | 81.6                                                               | ASPIRATION CURETTAGE OF UTERUS                                        |                                 |
|            |                       |        | 81.61                                                              | ASPIRATION CURETTAGE FOLLOWING DELIVERY OR ABORTION                   |                                 |
|            |                       |        | 81.69                                                              | OTHER ASPIRATION CURETTAGE OF UTERUS                                  |                                 |
|            |                       |        | 86.3                                                               | REMOVAL OF INTRAPERITONEAL EMBRYO                                     |                                 |
|            |                       |        | 86.4                                                               | OTHER REMOVAL OF EMBRYO                                               |                                 |
|            |                       |        | 86.41                                                              | HYSTEROTOMY TO TERMINATE PREGNANCY                                    |                                 |
|            |                       |        | 86.42                                                              | HYSTERECTOMY TO TERMINATE PREGNANCY                                   |                                 |
|            |                       |        | 86.49                                                              | OTHER REMOVAL OF EMBRYO NEC                                           |                                 |
|            |                       |        | 87.0                                                               | INTRA-AMNIOTIC INJECTION FOR TERMINATION OF PREGNANCY                 |                                 |
|            |                       |        | 87.1                                                               | VACUUM ASPIRATION FOR TERMINATION OF PREGNANCY                        |                                 |
|            |                       |        | 87.2                                                               | OTHER TERMINATION OF PREGNANCY                                        |                                 |
|            |                       |        | 87.21                                                              | DILATION AND CURETTAGE FOR TERMINATION OF PREGNANCY                   |                                 |
|            |                       |        | 87.29                                                              | OTHER TERMINATION OF PREGNANCY NEC                                    |                                 |
|            |                       |        | ICD-10                                                             | O00-O08                                                               | Pregnancy with abortive outcome |
|            |                       |        |                                                                    | O00                                                                   | Ectopic pregnancy               |
|            |                       | O01    |                                                                    | Hydatidiform mole                                                     |                                 |
|            |                       | O02    |                                                                    | Other abnormal products of conception                                 |                                 |
|            |                       | O03    |                                                                    | Spontaneous abortion                                                  |                                 |
|            |                       | O04    |                                                                    | Complications following (Induced/Medical) termination of pregnancy    |                                 |

**eTable 3: Cont'd**

| Discipline                                    | Variable              | Source                                           | Code(s)                                                            | Description                                                    |
|-----------------------------------------------|-----------------------|--------------------------------------------------|--------------------------------------------------------------------|----------------------------------------------------------------|
| Exposures                                     | Abortion <sup>a</sup> | ICD-10                                           | O05                                                                | Other abortion                                                 |
|                                               |                       |                                                  | O06                                                                | Unspecified abortion                                           |
|                                               |                       |                                                  | O07                                                                | Failed attempted termination of pregnancy                      |
|                                               |                       |                                                  | O08                                                                | Complications following ectopic and molar pregnancy            |
|                                               |                       | CCI                                              | 5.CA.20.^A                                                         | Pharmacotherapy (in preparation for), termination of pregnancy |
|                                               |                       |                                                  | 5.CA.24.^A                                                         | Preparation by dilating cervix (for), termination of pregnancy |
|                                               |                       |                                                  | 5.CA.88.^A                                                         | Pharmacological termination of pregnancy                       |
|                                               |                       |                                                  | 5.CA.89.^A                                                         | Surgical termination of pregnancy                              |
|                                               |                       | OHIP Fee codes (Use feesuff 'A')                 | A922                                                               | MEDICAL MANAGEMENT OF ECTOPIC PREGNANCY-INITIAL SERVICE        |
|                                               |                       |                                                  | G397                                                               | MANAGEMENT OF ECTOPIC PREGNANCY                                |
|                                               |                       |                                                  | S752                                                               | FEM.GENITAL SYST.-INDUCED-CURRENT,INTRA-AMNIOTIC INJ.(COMP.)   |
|                                               |                       |                                                  | S756                                                               | CORPUS UTERI- ABORTION – MISSED.                               |
|                                               |                       |                                                  | S768                                                               | FEM.GENITAL SYST.- SPONTANEOUS-INCOMPLETE- INCLUDING D&C       |
|                                               |                       |                                                  | S784                                                               | FALLOP.TUBE-EXC,SUT,REP-ECTOPIC PREGNANCY.(SURG.MANAGMNT).     |
|                                               |                       |                                                  | S785                                                               | FEM.GENITAL SYST.-INDUCED-INTRA-AMNIOTIC INJ. (INCOMP.)        |
|                                               |                       | OHIP DXCODE                                      | 632                                                                | Missed abortion                                                |
|                                               |                       |                                                  | 633                                                                | Ectopic pregnancy                                              |
|                                               |                       |                                                  | 634                                                                | Incomplete abortion, complete abortion                         |
|                                               |                       | Delivery <sup>b</sup> (Live-birth OR Stillbirth) | MOMBAB Y                                                           | M_STILLBIRTH                                                   |
| Treatment                                     | Chemotherapy          | NACRS (ICD-10)                                   | Z511                                                               |                                                                |
|                                               |                       | NDFP                                             | TREATMENT_DATE                                                     |                                                                |
|                                               |                       | OHIP                                             | G281; G339; G345; G359; G381; G382; H530 (outpatient)              |                                                                |
|                                               | Radiation therapy     | ICD-9                                            | V58.0 – Radiotherapy                                               |                                                                |
|                                               |                       | ICD-10                                           | Z510 – Radiotherapy session                                        |                                                                |
|                                               |                       | CCI                                              | 1YM27JADA – Radiation, breast using superficial (photon) radiation |                                                                |
|                                               |                       |                                                  | 1YM27JADB – Radiation, breast using orthovoltage (deep) radiation  |                                                                |
| 1YM27JADC – Radiation, breast using Cobalt 60 |                       |                                                  |                                                                    |                                                                |

|  |  |      |                                                                                                                                                                                                                |
|--|--|------|----------------------------------------------------------------------------------------------------------------------------------------------------------------------------------------------------------------|
|  |  |      | 1YM27JADE – Radiation, breast using linear accelerator<br>1YM27JADF – Radiation, breast using electron radiation<br>1YM27JADG – Radiation, breast using particulate beam (e.g. proton beam)                    |
|  |  | OHIP | X310 – Radiotherapy – Level 1 – Simple Treatment Planning<br>X311 – Level 2 – Intermediate Treatment Planning<br>X312 – Level 3 – Complex Treatment Planning<br>X313 – Level 4 – Full 3D Treatment Preparation |

**Abbreviations:** OHIP, Ontario Health Insurance Plan; ICD, International Classification of Diseases; CCI, Canadian Classification of Health Intervention; CCP, Canadian Classification of Diagnostic, Therapeutic and Surgical Procedures; NACRS, National Ambulatory Care Reporting System; NDFP, New Drug Funding Plan.

<sup>a</sup> Abortion was defined as cessation of pregnancy before 20 weeks of gestation.

<sup>b</sup> Stillbirth was defined as cessation of pregnancy from 20 weeks of gestation, or with birth of a fetus 500 g or more, in which fetus lacked vital signs at birth. Live-birth was defined as birth of a live baby from 20 weeks and onwards.



**eTable 4.** Characteristics of Women in the Study Population

| Characteristic                                 | N     | %                            | Proportion who died (%) |
|------------------------------------------------|-------|------------------------------|-------------------------|
| All women                                      | 7,553 | 100                          | 13.0                    |
| Year of diagnosis                              |       |                              |                         |
| 2004-2007                                      | 2,687 | 35.6                         | 19.7                    |
| 2008-2011                                      | 2,863 | 37.9                         | 12.4                    |
| 2012-2014                                      | 2,003 | 26.5                         | 4.6                     |
| Age group                                      |       |                              |                         |
| 20-29 years                                    | 351   | 4.6                          | 16.2                    |
| 30-34 years                                    | 858   | 11.4                         | 15.1                    |
| 35-39 years                                    | 1,992 | 26.4                         | 14.9                    |
| 40-44 years                                    | 4,352 | 57.6                         | 11.4                    |
| Stage at diagnosis                             |       |                              |                         |
| Stage I                                        | 2,082 | 27.6                         | 4.0                     |
| Stage II                                       | 3,512 | 46.5                         | 9.0                     |
| Stage III                                      | 1,619 | 21.4                         | 23.5                    |
| Stage IV                                       | 340   | 4.5                          | 58.2                    |
| Tumor size (mm)                                |       |                              |                         |
| 20mm or less                                   | 1,239 | 34.6                         | 2.4                     |
| 21-50mm                                        | 1,731 | 48.4                         | 6.4                     |
| >50mm                                          | 609   | 17.0                         | 13.8                    |
| Unknown size                                   | 3,974 | -                            | 19.0                    |
| Nodal status                                   |       |                              |                         |
| Node-negative                                  | 1,756 | 51.3                         | 2.2                     |
| Node-positive                                  | 1,669 | 48.7                         | 9.2                     |
| Unknown nodes                                  | 4,128 | -                            | 19.0                    |
| Tumor grade                                    |       |                              |                         |
| Low grade                                      | 336   | 12.2                         | 0.9                     |
| Medium grade                                   | 1,063 | 38.6                         | 2.3                     |
| High grade                                     | 1,355 | 49.2                         | 9.0                     |
| Unknown grade                                  | 4,799 | -                            | 17.3                    |
| Estrogen Receptor status (ER)                  |       |                              |                         |
| ER-negative                                    | 878   | 25.0                         | 14.6                    |
| ER-positive                                    | 2,641 | 75.0                         | 4.2                     |
| ER-borderline/unknown                          | 4,034 | -                            | 18.3                    |
| Progesterone Receptor status (PR)              |       |                              |                         |
| PR-negative                                    | 1,076 | 30.6                         | 13.7                    |
| PR-positive                                    | 2,438 | 69.4                         | 3.7                     |
| PR-borderline/unknown                          | 4,039 | -                            | 18.3                    |
| ERBB2 status                                   |       |                              |                         |
| ERBB2-negative                                 | 1,739 | 23.7                         | 6.3                     |
| ERBB2-positive                                 | 1,329 | 17.6                         | 11.7                    |
| ERBB2-borderline/unknown                       | 4,485 | 59.3                         | 15.9                    |
| Chemotherapy                                   |       |                              |                         |
| No                                             | 1,445 | 19.1                         | 7.4                     |
| Yes                                            | 6,108 | 80.9                         | 14.3                    |
| Radiation therapy                              |       |                              |                         |
| No                                             | 1,955 | 25.9                         | 14.0                    |
| Yes                                            | 5,598 | 74.1                         | 12.6                    |
| Mean follow-up time (years)<br>(median; range) | 7,553 | 5.2<br>(5.0; 0.003-<br>11.2) | -                       |

**eTable 5.** Parity of Women From 5 Years Prior to 5 Years After Breast Cancer Diagnosis

| Parity                  | Number of women with live-births | Number of women with abortions | Number of women with total pregnancies |
|-------------------------|----------------------------------|--------------------------------|----------------------------------------|
| 0                       | 6,251 <sup>a, b</sup>            | 6,853 <sup>c</sup>             | 5,832 <sup>d</sup>                     |
| 1                       | 1075                             | 590                            | 1,202                                  |
| 2                       | 210                              | 82                             | 398                                    |
| 3 and more <sup>e</sup> | 17                               | 28                             | 121                                    |
| Mean                    | 0.20                             | 0.11                           | 0.32                                   |
| Range                   | 0-4                              | 0-5                            | 0-5                                    |
| Total (one or more)     | 1,302                            | 700                            | 1,721                                  |
| Total number of women   | 7,553                            | 7,553                          | 7,553                                  |

<sup>a</sup> A woman who had no live-birth might had an abortion.

<sup>b</sup> Live-birth includes 14 stillbirths.

<sup>c</sup> A woman who had no abortion might had a live-birth.

<sup>d</sup> No pregnancy includes no live-birth or stillbirth *AND* no abortion.

<sup>e</sup> For privacy protection, cells with frequency  $\leq 6$  have been merged with the parity category '3 or more'.

**eTable 6.** Characteristics of Women in the Study Population According to the Exposure Groups

| Characteristic                | All women | Exposure groups <sup>a, b</sup> |           |                                |           |                                    |         |                                   |         |
|-------------------------------|-----------|---------------------------------|-----------|--------------------------------|-----------|------------------------------------|---------|-----------------------------------|---------|
|                               |           | No pregnancy                    |           | Pregnancy before breast cancer |           | Pregnancy-associated breast cancer |         | Pregnancy following breast cancer |         |
|                               |           | N = 7,553                       | n = 5,832 | 77.2%                          | n = 1,108 | 14.7%                              | n = 501 | 6.6%                              | n = 112 |
| Year of diagnosis             |           |                                 |           |                                |           |                                    |         |                                   |         |
| 2004-2007                     | 2,687     | 2,098                           | 36.0      | 356                            | 32.1      | 176                                | 35.1    | 57                                | 50.9    |
| 2008-2011                     | 2,864     | 2,178                           | 37.3      | 433                            | 39.1      | 198                                | 39.5    | 55                                | 49.1    |
| 2012-2014                     | 2,002     | 1,556                           | 26.7      | 319                            | 28.8      | 127                                | 25.3    | - <sup>c</sup>                    | -       |
| Age group                     |           |                                 |           |                                |           |                                    |         |                                   |         |
| 20-29 years                   | 351       | 217                             | 3.7       | 36                             | 3.2       | 66                                 | 13.2    | 32                                | 28.6    |
| 30-34 years                   | 858       | 431                             | 7.4       | 214                            | 19.3      | 168                                | 33.5    | 45                                | 40.2    |
| 35-39 years                   | 1,996     | 1,325                           | 22.7      | 452                            | 40.8      | 184                                | 36.7    | 35                                | 31.2    |
| 40-44 years                   | 4,348     | 3,859                           | 66.2      | 406                            | 36.6      | 83                                 | 16.7    | - <sup>c</sup>                    | -       |
| Stage at diagnosis            |           |                                 |           |                                |           |                                    |         |                                   |         |
| Stage I                       | 2,082     | 1,665                           | 28.5      | 268                            | 24.2      | 111                                | 22.2    | 38                                | 33.9    |
| Stage II                      | 3,512     | 2,704                           | 46.4      | 514                            | 46.4      | 237                                | 47.3    | 57                                | 50.9    |
| Stage III                     | 1,620     | 1,207                           | 20.7      | 268                            | 24.2      | 128                                | 25.5    | 17                                | 15.2    |
| Stage IV                      | 339       | 256                             | 4.4       | 58                             | 5.2       | 25                                 | 5.0     | - <sup>c</sup>                    | -       |
| Tumor size (mm)               |           |                                 |           |                                |           |                                    |         |                                   |         |
| 20 mm or less                 | 1,239     | 939                             | 34.4      | 213                            | 37.0      | 79                                 | 31.8    | 8                                 | 34.8    |
| 21-50 mm                      | 1,733     | 1,332                           | 48.8      | 259                            | 45.0      | 127                                | 51.2    | 15                                | 65.2    |
| >50 mm                        | 607       | 461                             | 16.9      | 104                            | 18.1      | 42                                 | 16.9    | - <sup>c</sup>                    | -       |
| Unknown                       | 3,974     | 3,100                           | -         | 532                            | -         | 253                                | -       | 89                                | -       |
| Nodal status                  |           |                                 |           |                                |           |                                    |         |                                   |         |
| Node-negative                 | 1,762     | 1,364                           | 52.3      | 263                            | 47.0      | 114                                | 47.9    | 21                                | 100.0   |
| Node-positive                 | 1,663     | 1,242                           | 47.7      | 297                            | 53.0      | 124                                | 52.1    | - <sup>c</sup>                    | -       |
| Unknown nodes                 | 4,128     | 3,226                           | -         | 548                            | -         | 263                                | -       | 91                                | -       |
| Estrogen Receptor status (ER) |           |                                 |           |                                |           |                                    |         |                                   |         |
| ER-negative                   | 878       | 621                             | 23.2      | 158                            | 27.4      | 89                                 | 36.5    | 10                                | 45.5    |
| ER-positive                   | 2,641     | 2,055                           | 76.8      | 419                            | 72.6      | 155                                | 63.5    | 12                                | 54.5    |
| ER-borderline/unknown         | 4,034     | 3,156                           | -         | 531                            | -         | 257                                | -       | 90                                | -       |

**eTable 6: Cont'd**

| Characteristic                              | All women             | Exposure groups <sup>a, b</sup> |           |                                |           |                                    |         |                                   |         |
|---------------------------------------------|-----------------------|---------------------------------|-----------|--------------------------------|-----------|------------------------------------|---------|-----------------------------------|---------|
|                                             |                       | No pregnancy                    |           | Pregnancy before breast cancer |           | Pregnancy-associated breast cancer |         | Pregnancy following breast cancer |         |
|                                             |                       | N = 7,553                       | n = 5,832 | 77.2%                          | n = 1,108 | 14.7%                              | n = 501 | 6.6%                              | n = 112 |
| Progesterone Receptor status (PR)           |                       |                                 |           |                                |           |                                    |         |                                   |         |
| PR-negative                                 | 1,076                 | 780                             | 29.2      | 184                            | 31.9      | 100                                | 41.0    | 12                                | 54.5    |
| PR-positive                                 | 2,438                 | 1,892                           | 70.8      | 392                            | 68.1      | 144                                | 59.0    | 10                                | 45.5    |
| PR-borderline/unknown                       | 4,039                 | 3,160                           | -         | 532                            | -         | 257                                | -       | 90                                | -       |
| ERBB2 status                                |                       |                                 |           |                                |           |                                    |         |                                   |         |
| ERBB2-negative                              | 1,739                 | 1,343                           | 23.0      | 278                            | 25.1      | 111                                | 22.2    | 7                                 | 6.3     |
| ERBB2-positive                              | 1,329                 | 975                             | 16.7      | 234                            | 21.2      | 97                                 | 19.4    | 23                                | 20.5    |
| ERBB2-borderline/unknown                    | 4,485                 | 3,514                           | 60.2      | 596                            | 53.8      | 293                                | 58.5    | 82                                | 73.2    |
| Chemotherapy                                |                       |                                 |           |                                |           |                                    |         |                                   |         |
| No                                          | 1,445                 | 1,191                           | 20.4      | 158                            | 14.3      | 78                                 | 15.6    | 18                                | 16.1    |
| Yes                                         | 6,108                 | 4,641                           | 79.6      | 950                            | 85.7      | 423                                | 84.4    | 94                                | 83.9    |
| Radiation therapy                           |                       |                                 |           |                                |           |                                    |         |                                   |         |
| No                                          | 1,955                 | 1,498                           | 25.7      | 297                            | 26.8      | 135                                | 27.0    | 25                                | 22.3    |
| Yes                                         | 5,598                 | 4,334                           | 74.3      | 811                            | 73.2      | 366                                | 73.0    | 87                                | 77.7    |
| Status as of December 31, 2014              |                       |                                 |           |                                |           |                                    |         |                                   |         |
| Alive                                       | 6,578                 | 5,104                           | 87.5      | 955                            | 86.2      | 407                                | 81.2    | 112                               | 100.0   |
| Dead <sup>d</sup>                           | 975                   | 728                             | 12.5      | 153                            | 13.8      | 94                                 | 18.8    | - <sup>c</sup>                    | -       |
| Mean follow-up time (years) (median; range) | 5.2 (5.0; 0.003-11.2) | 5.3 (5.0; 0.003-11.2)           |           | 4.9 (4.5; 0.3-11.2)            |           | 5.0 (4.6; 0.3-11.1)                |         | 7.2 (6.9; 2.9-11.0)               |         |

<sup>a</sup> Pregnancy included abortion, live-birth, and stillbirth.

<sup>b</sup> Definitions of exposure groups: No pregnancy: no conception from 5 years prior to, until 5 years after, the index date of breast cancer diagnosis; Pregnancy before breast cancer: conception in the interval 60 months to 12 months prior to the index date of breast cancer diagnosis; Pregnancy-associated breast cancer: conception in the interval 11 months prior to, until 21 months after, the index date of breast cancer diagnosis; Pregnancy following breast cancer: conception in the interval 22 months to 60 months after the index date of breast cancer diagnosis.

<sup>c</sup> For privacy protection, the table does not show cells with frequency ≤6.

<sup>d</sup> Dead category includes, (1) death by breast cancer, (2) death by other cause, and (3) death by an unknown cause.

**eTable 7.** Cox Proportional Hazard Model to Estimate the Hazard Ratio (HR) of All-Cause Mortality for Women Who Had Pregnancy; No Chemotherapy <sup>a, b</sup>

| Characteristic                     | Age-Adjusted |           |         | Multivariable <sup>d</sup> |           |         |
|------------------------------------|--------------|-----------|---------|----------------------------|-----------|---------|
|                                    | HR           | 95% CI    | P Value | HR                         | 95% CI    | P Value |
| Age group                          |              |           |         |                            |           |         |
| 40-44 years                        | 1            |           |         | 1                          |           |         |
| 35-39 years                        | 1.25         | 1.06-1.48 | .007    | 1.22                       | 1.03-1.44 | .02     |
| 30-34 years                        | 1.74         | 1.41-2.15 | <.001   | 1.55                       | 1.24-1.94 | .0001   |
| 20-29 years                        | 2.04         | 1.53-2.74 | <.001   | 1.75                       | 1.30-2.37 | .02     |
| Tumor size (mm)                    |              |           |         |                            |           |         |
| 20 mm or less                      | 1            |           |         | 1                          |           |         |
| 21-50 mm                           | 2.59         | 1.73-3.89 | <.001   | 1.74                       | 1.15-2.63 | .008    |
| >50 mm                             | 6.77         | 4.46-10.3 | <.001   | 3.70                       | 2.41-5.67 | <.001   |
| Unknown                            | 3.65         | 2.52-5.27 | <.001   | 4.36                       | 2.35-8.06 | <.001   |
| Nodal status                       |              |           |         |                            |           |         |
| Node-negative                      | 1            |           |         | 1                          |           |         |
| Node-positive                      | 4.24         | 2.97-6.05 | <.001   | 3.94                       | 2.74-5.68 | <.001   |
| Unknown nodes                      | 4.16         | 2.99-5.78 | <.001   | 12.2                       | 7.70-19.3 | <.001   |
| Estrogen Receptor status (ER)      |              |           |         |                            |           |         |
| ER-negative                        | 1            |           |         | 1                          |           |         |
| ER-positive                        | 0.26         | 0.50-0.34 | <.001   | 0.59                       | 0.39-0.91 | .02     |
| ER-borderline/unknown              | 0.54         | 0.44-0.65 | <.001   | 0.10                       | 0.01-0.79 | .03     |
| ERBB2 status                       |              |           |         |                            |           |         |
| ERBB2-negative                     | 1            |           |         | 1                          |           |         |
| ERBB2-positive                     | 0.97         | 0.75-1.25 | .81     | 0.65                       | 0.49-0.88 | .004    |
| ERBB2-borderline/unknown           | 1.13         | 0.92-1.39 | .26     | 0.84                       | 0.64-1.12 | .24     |
| Radiation therapy                  |              |           |         |                            |           |         |
| No                                 | 1            |           |         | 1                          |           |         |
| Yes                                | 0.78         | 0.67-0.92 | .002    | 0.75                       | 0.64-0.88 | .004    |
| Exposure groups <sup>c</sup>       |              |           |         |                            |           |         |
| No pregnancy                       | 1            |           |         | 1                          |           |         |
| Pregnancy before breast cancer     | 1.03         | 0.85-1.27 | .73     | 1.02                       | 0.83-1.25 | .84     |
| Pregnancy-associated breast cancer | 1.18         | 0.91-1.53 | .20     | 1.12                       | 0.86-1.45 | .40     |

<sup>a</sup> Pregnancy included abortion, live-birth, and stillbirth.

<sup>b</sup> This analysis excluded 112 women who had pregnancy following breast cancer. Of the remaining 7,441 women, 5,832 had no pregnancy; 1,108 had pregnancy before breast cancer, and 501 had pregnancy-associated breast cancer.

<sup>c</sup> Definitions of exposure groups: No pregnancy: no conception from 5 years prior to, until 5 years after, the index date of breast cancer diagnosis; Pregnancy before breast cancer: conception in the interval 60 months to 12 months prior to the index date of breast cancer diagnosis; Pregnancy-associated breast cancer: conception in the interval 11 months prior to, until 21 months after, the index date of breast cancer diagnosis.

<sup>d</sup> Included for the year of diagnosis, age group, tumor size, nodal status, estrogen receptor status, progesterone receptor status, ERBB2 status, and radiation therapy.

**eTable 8.** Cox Proportional Hazard Model to Estimate the Hazard Ratio (HR) of All-Cause Mortality for Women who had Pregnancy; No Radiotherapy <sup>a, b</sup>

| Characteristic                     | Age-Adjusted |           |         | Multivariable <sup>d</sup> |           |         |
|------------------------------------|--------------|-----------|---------|----------------------------|-----------|---------|
|                                    | HR           | 95% CI    | P Value | HR                         | 95% CI    | P Value |
| Age group                          |              |           |         |                            |           |         |
| 40-44 years                        | 1            |           |         | 1                          |           |         |
| 35-39 years                        | 1.25         | 1.06-1.48 | .007    | 1.19                       | 1.00-1.41 | .05     |
| 30-34 years                        | 1.74         | 1.41-2.15 | <.001   | 1.51                       | 1.21-1.90 | .0003   |
| 20-29 years                        | 2.04         | 1.53-2.74 | <.001   | 1.77                       | 1.31-2.38 | .0002   |
| Tumor size (mm)                    |              |           |         |                            |           |         |
| 20 mm or less                      | 1            |           |         | 1                          |           |         |
| 21-50 mm                           | 2.59         | 1.73-3.89 | <.001   | 1.64                       | 1.09-2.47 | .02     |
| >50 mm                             | 6.77         | 4.46-10.3 | <.001   | 3.33                       | 2.18-5.10 | <.001   |
| Unknown                            | 3.65         | 2.52-5.27 | <.001   | 3.88                       | 2.04-7.36 | <.001   |
| Nodal status                       |              |           |         |                            |           |         |
| Node-negative                      | 1            |           |         | 1                          |           |         |
| Node-positive                      | 4.24         | 2.97-6.05 | <.001   | 3.68                       | 2.56-5.29 | <.001   |
| Unknown nodes                      | 4.16         | 2.99-5.78 | <.001   | 14.3                       | 9.05-22.5 | <.001   |
| Estrogen Receptor status (ER)      |              |           |         |                            |           |         |
| ER-negative                        | 1            |           |         | 1                          |           |         |
| ER-positive                        | 0.26         | 0.50-0.34 | <.001   | 0.61                       | 0.39-0.93 | .02     |
| ER-borderline/unknown              | 0.54         | 0.44-0.65 | <.001   | 0.06                       | 0.01-0.47 | .008    |
| ERBB2 status                       |              |           |         |                            |           |         |
| ERBB2-negative                     | 1            |           |         | 1                          |           |         |
| ERBB2-positive                     | 0.97         | 0.75-1.25 | .81     | 0.64                       | 0.48-0.86 | .003    |
| ERBB2-borderline/unknown           | 1.13         | 0.92-1.39 | .26     | 0.90                       | 0.68-1.19 | .46     |
| Chemotherapy                       |              |           |         |                            |           |         |
| No                                 | 1            |           |         | 1                          |           |         |
| Yes                                | 1.90         | 1.51-2.39 | <.001   | 1.70                       | 1.35-2.15 | <.001   |
| Exposure groups <sup>c</sup>       |              |           |         |                            |           |         |
| No pregnancy                       | 1            |           |         | 1                          |           |         |
| Pregnancy before breast cancer     | 1.03         | 0.85-1.27 | .73     | 1.01                       | 0.83-1.24 | .88     |
| Pregnancy-associated breast cancer | 1.18         | 0.91-1.53 | .20     | 1.11                       | 0.86-1.44 | .42     |

<sup>a</sup> Pregnancy included abortion, live-birth, and stillbirth.

<sup>b</sup> This analysis excluded 112 women who had pregnancy following breast cancer. Of the remaining 7,441 women, 5,832 had no pregnancy; 1,108 had pregnancy before breast cancer, and 501 had pregnancy-associated breast cancer.

<sup>c</sup> Definitions of exposure groups: No pregnancy: no conception from 5 years prior to, until 5 years after, the index date of breast cancer diagnosis; Pregnancy before breast cancer: conception in the interval 60 months to 12 months prior to the index date of breast cancer diagnosis; Pregnancy-associated breast cancer: conception in the interval 11 months prior to, until 21 months after, the index date of breast cancer diagnosis.

<sup>d</sup> Included for the year of diagnosis, age group, tumor size, nodal status, estrogen receptor status, progesterone receptor status, ERBB2 status, and chemotherapy.

**eTable 9.** Cox Proportional Hazard Model to Estimate the Hazard Ratio (HR) of All-Cause Mortality for Women who had Pregnancy; No Chemotherapy; No Radiotherapy <sup>a, b</sup>

| Characteristic                     | Age-Adjusted |           |         | Multivariable <sup>d</sup> |           |         |
|------------------------------------|--------------|-----------|---------|----------------------------|-----------|---------|
|                                    | HR           | 95% CI    | P Value | HR                         | 95% CI    | P Value |
| Age group                          |              |           |         |                            |           |         |
| 40-44 years                        | 1            |           |         | 1                          |           |         |
| 35-39 years                        | 1.25         | 1.06-1.48 | .007    | 1.21                       | 1.02-1.44 | .02     |
| 30-34 years                        | 1.74         | 1.41-2.15 | <.001   | 1.56                       | 1.24-1.95 | .0001   |
| 20-29 years                        | 2.04         | 1.53-2.74 | <.001   | 1.78                       | 1.32-2.41 | .0002   |
| Tumor size (mm)                    |              |           |         |                            |           |         |
| 20 mm or less                      | 1            |           |         | 1                          |           |         |
| 21-50 mm                           | 2.59         | 1.73-3.89 | <.001   | 1.74                       | 1.15-2.63 | .008    |
| >50 mm                             | 6.77         | 4.46-10.3 | <.001   | 3.58                       | 2.34-5.49 | <.001   |
| Unknown                            | 3.65         | 2.52-5.27 | <.001   | 4.35                       | 2.33-8.11 | <.001   |
| Nodal status                       |              |           |         |                            |           |         |
| Node-negative                      | 1            |           |         | 1                          |           |         |
| Node-positive                      | 4.24         | 2.97-6.05 | <.001   | 3.82                       | 2.66-5.49 | <.001   |
| Unknown nodes                      | 4.16         | 2.99-5.78 | <.001   | 13.3                       | 8.43-21.0 | <.001   |
| Estrogen Receptor status (ER)      |              |           |         |                            |           |         |
| ER-negative                        | 1            |           |         | 1                          |           |         |
| ER-positive                        | 0.26         | 0.50-0.34 | <.001   | 0.59                       | 0.39-0.91 | .02     |
| ER-borderline/unknown              | 0.54         | 0.44-0.65 | <.001   | 0.08                       | 0.01-0.63 | .02     |
| ERBB2 status                       |              |           |         |                            |           |         |
| ERBB2-negative                     | 1            |           |         | 1                          |           |         |
| ERBB2-positive                     | 0.97         | 0.75-1.25 | .81     | 0.67                       | 0.50-0.90 | .007    |
| ERBB2-borderline/unknown           | 1.13         | 0.92-1.39 | .26     | 0.88                       | 0.66-1.16 | .36     |
| Exposure groups <sup>c</sup>       |              |           |         |                            |           |         |
| No pregnancy                       | 1            |           |         | 1                          |           |         |
| Pregnancy before breast cancer     | 1.03         | 0.85-1.27 | .73     | 1.02                       | 0.83-1.25 | .83     |
| Pregnancy-associated breast cancer | 1.18         | 0.91-1.53 | .20     | 1.12                       | 0.86-1.45 | .40     |

<sup>a</sup> Pregnancy included abortion, live-birth, and stillbirth.

<sup>b</sup> This analysis excluded 112 women who had pregnancy following breast cancer. Of the remaining 7,441 women, 5,832 had no pregnancy; 1,108 had pregnancy before breast cancer, and 501 had pregnancy-associated breast cancer.

<sup>c</sup> Definitions of exposure groups: No pregnancy: no conception from 5 years prior to, until 5 years after, the index date of breast cancer diagnosis; Pregnancy before breast cancer: conception in the interval 60 months to 12 months prior to the index date of breast cancer diagnosis; Pregnancy-associated breast cancer: conception in the interval 11 months prior to, until 21 months after, the index date of breast cancer diagnosis.

<sup>d</sup> Included for the year of diagnosis, age group, tumor size, nodal status, estrogen receptor status, progesterone receptor status, and ERBB2 status.

**eTable 10.** Cox Proportional Hazard Model to Estimate the Hazard Ratio (HR) of All-Cause Mortality for Women who had an Abortion <sup>a, b</sup>

| Characteristic                     | Age-Adjusted |           |         | Multivariable <sup>c</sup> |            |         |
|------------------------------------|--------------|-----------|---------|----------------------------|------------|---------|
|                                    | HR           | 95% CI    | P Value | HR                         | 95% CI     | P Value |
| Age group                          |              |           |         |                            |            |         |
| 40-44 years                        | 1            |           |         | 1                          |            |         |
| 35-39 years                        | 1.34         | 1.12-1.60 | .001    | 1.29                       | 1.08-1.55  | .006    |
| 30-34 years                        | 1.59         | 1.23-2.06 | .0004   | 1.54                       | 1.18-2.01  | .001    |
| 20-29 years                        | 1.86         | 1.32-2.62 | .0004   | 1.60                       | 1.13-2.26  | .008    |
| Tumor size (mm)                    |              |           |         |                            |            |         |
| 20 mm or less                      | 1            |           |         | 1                          |            |         |
| 21-50 mm                           | 3.53         | 2.18-5.71 | <.001   | 2.13                       | 1.31-3.47  | .002    |
| >50 mm                             | 9.03         | 4.48-14.9 | <.001   | 4.34                       | 2.61-7.23  | <.001   |
| Unknown size                       | 4.43         | 2.83-6.94 | <.001   | 4.98                       | 2.35-10.5  | <.001   |
| Nodal status                       |              |           |         |                            |            |         |
| Node-negative                      | 1            |           |         | 1                          |            |         |
| Node-positive                      | 4.30         | 2.95-6.29 | <.001   | 3.95                       | 2.68-5.81  | <.001   |
| Unknown nodes                      | 3.82         | 2.69-5.42 | <.001   | 12.1                       | 7.24-20.3  | <.001   |
| ER status                          |              |           |         |                            |            |         |
| ER-negative                        | 1            |           |         | 1                          |            |         |
| ER-positive                        | 0.25         | 0.19-0.33 | <.001   | 0.59                       | 0.37-0.94  | .03     |
| ER-borderline/unknown              | 0.48         | 0.39-0.60 | <.001   | 0.02                       | 0.002-0.13 | .0001   |
| ERBB2 status                       |              |           |         |                            |            |         |
| ERBB2-negative                     | 1            |           |         | 1                          |            |         |
| ERBB2-positive                     | 0.89         | 0.67-1.18 | .43     | 0.51                       | 0.37-0.71  | <.001   |
| ERBB2-borderline/unknown           | 1.03         | 0.82-1.29 | .79     | 0.73                       | 0.53-0.99  | .04     |
| Chemotherapy                       |              |           |         |                            |            |         |
| No                                 | 1            |           |         | 1                          |            |         |
| Yes                                | 1.95         | 1.53-2.50 | <.001   | 1.91                       | 1.48-2.46  | <.001   |
| Radiation therapy                  |              |           |         |                            |            |         |
| No                                 | 1            |           |         | 1                          |            |         |
| Yes                                | 0.76         | 0.64-0.90 | .001    | 0.64                       | 0.54-0.77  | <.001   |
| Exposure groups <sup>d</sup>       |              |           |         |                            |            |         |
| No pregnancy                       | 1            |           |         | 1                          |            |         |
| Pregnancy before breast cancer     | 1.08         | 0.80-1.46 | .65     | 1.13                       | 0.83-1.53  | .43     |
| Pregnancy-associated breast cancer | 0.79         | 0.50-1.23 | .30     | 0.90                       | 0.57-1.41  | 0.63    |

<sup>a</sup> This analysis excluded 1,051 women who only had live-birth. Of the remaining 6,502 women, 5,832 had no pregnancy; 403 had pregnancy before breast cancer; 210 had pregnancy-associated breast cancer, and 57 had pregnancy following breast cancer. After further excluding women with pregnancy following breast cancer (n=57), a total of 6,445 women qualified for this analysis.

<sup>b</sup> Definitions of exposure groups: No pregnancy: no conception from 5 years prior to, until 5 years after, the index date of breast cancer diagnosis; Pregnancy before breast cancer: conception in the interval 60 months to 12 months prior to the index date of breast cancer diagnosis; Pregnancy-associated breast cancer: conception in the interval 11 months prior to, until 21 months after, the index date of breast cancer diagnosis.

<sup>c</sup> Included for the year of diagnosis, age group, tumor size, nodal status, estrogen receptor status, progesterone receptor status, ERBB2 status, chemotherapy, and radiation therapy.



**eTable 11.** Time-Dependent Adjusted Hazard Ratio of All-Cause Mortality for Women who had a Live Birth or Stillbirth<sup>a, b, c</sup>

| Time from breast cancer diagnosis (years) | Number of women who are alive | Number of women who died | Univariate (Adjusted for age only) |         | Multivariate <sup>b</sup> |         |
|-------------------------------------------|-------------------------------|--------------------------|------------------------------------|---------|---------------------------|---------|
|                                           | n (%)                         |                          | HR (95%CI)                         | P Value | HR (95%CI)                | P Value |
| All women                                 | 6,244 (87.0)                  | 933 (13.0)               |                                    |         |                           |         |
| No pregnancy                              | 5,104 (87.5)                  | 728 (12.5)               | 1                                  |         | 1                         |         |
| Pregnancy                                 |                               |                          |                                    |         |                           |         |
| -5 to -4 years                            | 392 (86.5)                    | 61 (13.5)                | 1.11 (0.85-1.46)                   | .43     | 1.13 (0.87-1.48)          | .36     |
| -4 to -3 years                            | 184 (85.6)                    | 31 (14.4)                | 1.17 (0.89-1.55)                   | .27     | 1.22 (0.92-1.61)          | .16     |
| -3 to -2 years                            | 199 (83.3)                    | 40 (16.7)                | 1.23 (0.92-1.64)                   | .16     | 1.12 (0.84-1.50)          | .43     |
| -2 to -1 years                            | 137 (72.1)                    | 53 (27.9)                | 1.70 (1.27-2.27)                   | .0004   | 1.48 (1.11-1.98)          | .007    |
| -1 to 0.5 years                           | 65 (82.3)                     | 14 (17.7)                | 1.01 (0.60-1.69)                   | .98     | 1.10 (0.65-1.85)          | .72     |
| 0.5 to 5 years                            | 190 (97.0)                    | 6 (3.0)                  | 0.22 (0.10-0.49)                   | .0003   | 0.25 (0.11-0.55)          | .0008   |

<sup>a</sup> This analysis included 7,177 women who had live-birth or stillbirth and excluded 376 women who only had abortion.

<sup>b</sup> The immortal time is a period during which, by design, the death cannot occur. Not addressing the immortal time in survival analysis can lead to an overestimation of survival. In our study, the immortal time was the time from breast cancer diagnosis to the date of conception in women with pregnancy following breast cancer. We performed time-dependent hazard models in which the follow-up was started from the date of conception, rather than the date of breast cancer diagnosis.

<sup>c</sup> Included for the year of diagnosis, age group, tumor size, nodal status, estrogen receptor status, progesterone receptor status, ERBB2 status, chemotherapy, and radiation therapy.

**eTable 12.** Cox Proportional Hazard Model to Estimate the Hazard Ratio (HR) of All-Cause Mortality Among Women with Pregnancy-Associated Breast Cancer Who Had a Live Birth or Stillbirth <sup>a, b</sup>

| Characteristic           | Age-Adjusted Hazard Ratio |            |         | Multivariable <sup>c</sup> Hazard Ratio |            |         |
|--------------------------|---------------------------|------------|---------|-----------------------------------------|------------|---------|
|                          | HR                        | 95% CI     | P Value | HR                                      | 95% CI     | P Value |
| Age group                |                           |            |         |                                         |            |         |
| 40-44 years              | 1                         |            |         | 1                                       | 1          |         |
| 35-39 years              | 0.70                      | 0.24-2.02  | .51     | 0.75                                    | 0.24-2.30  | .61     |
| 30-34 years              | 1.75                      | 0.67-4.54  | .25     | 1.71                                    | 0.61-4.83  | .31     |
| 20-29 years              | 1.93                      | 0.69-5.41  | .21     | 2.06                                    | 0.68-6.28  | .20     |
| Tumor size (mm)          |                           |            |         |                                         |            |         |
| 20 mm or less            | 1                         |            |         | 1                                       |            |         |
| 21-50 mm                 | 1.75                      | 0.35-8.70  | .49     | 1.50                                    | 0.24-9.35  | .67     |
| >50 mm                   | 4.49                      | 0.87-23.2  | .07     | 2.99                                    | 0.45-20.0  | .26     |
| Unknown size             | 4.34                      | 1.05-17.9  | .04     | 7.22                                    | 0.54-96.7  | .13     |
| Nodal status             |                           |            |         |                                         |            |         |
| Node-negative            | 1                         |            |         | 1                                       |            |         |
| Node-positive            | 8.31                      | 1.04-66.5  | .05     | 5.51                                    | 0.64-47.4  | .12     |
| Unknown nodes            | 14.5                      | 2.00-105.2 | .008    | 64.3                                    | 6.53-633.0 | .0004   |
| ER status                |                           |            |         |                                         |            |         |
| ER-negative              | 1                         |            |         | 1                                       | 1          |         |
| ER-positive              | 0.40                      | 0.13-1.22  | .11     | 0.37                                    | 0.04-3.37  | .38     |
| ER-borderline/unknown    | 1.27                      | 0.62-2.62  | .52     | 0.02                                    | 0.01-0.25  | .003    |
| ERBB2 status             |                           |            |         |                                         |            |         |
| ERBB2-negative           | 1                         |            |         | 1                                       |            |         |
| ERBB2-positive           | 1.49                      | 0.50-4.44  | .48     | 1.85                                    | 0.39-8.64  | .44     |
| ERBB2-borderline/unknown | 2.25                      | 0.89-5.72  | .09     | 2.99                                    | 0.66-13.4  | .15     |
| Chemotherapy             |                           |            |         |                                         |            |         |
| No                       | 1                         |            |         | 1                                       | 1          |         |
| Yes                      | 1.58                      | 0.67-3.70  | .30     | 1.74                                    | 0.62-4.83  | .29     |
| Radiation therapy        |                           |            |         |                                         |            |         |
| No                       | 1                         |            |         | 1                                       | 1          |         |
| Yes                      | 1.53                      | 0.81-2.89  | .19     | 1.35                                    | 0.65-2.83  | .42     |

<sup>a</sup> This analysis excluded 376 women who only had abortion. Of the remaining 7,177 women, 5,832 had no pregnancy; 938 had pregnancy-associated breast cancer; 320 had pregnancy before breast cancer, and 87 had pregnancy following breast cancer. The final analysis included 320 women with pregnancy-associated breast cancer.

<sup>b</sup> Pregnancy-associated breast cancer: conception in the interval 11 months prior to, until 21 months after, the index date of breast cancer diagnosis.

<sup>c</sup> Included for the year of diagnosis, age group, tumor size, nodal status, estrogen receptor status, progesterone receptor status, ERBB2 status, chemotherapy, and radiation therapy.

**eFigure 1.** History of Pregnancy in a Hypothetical Patient <sup>a</sup>

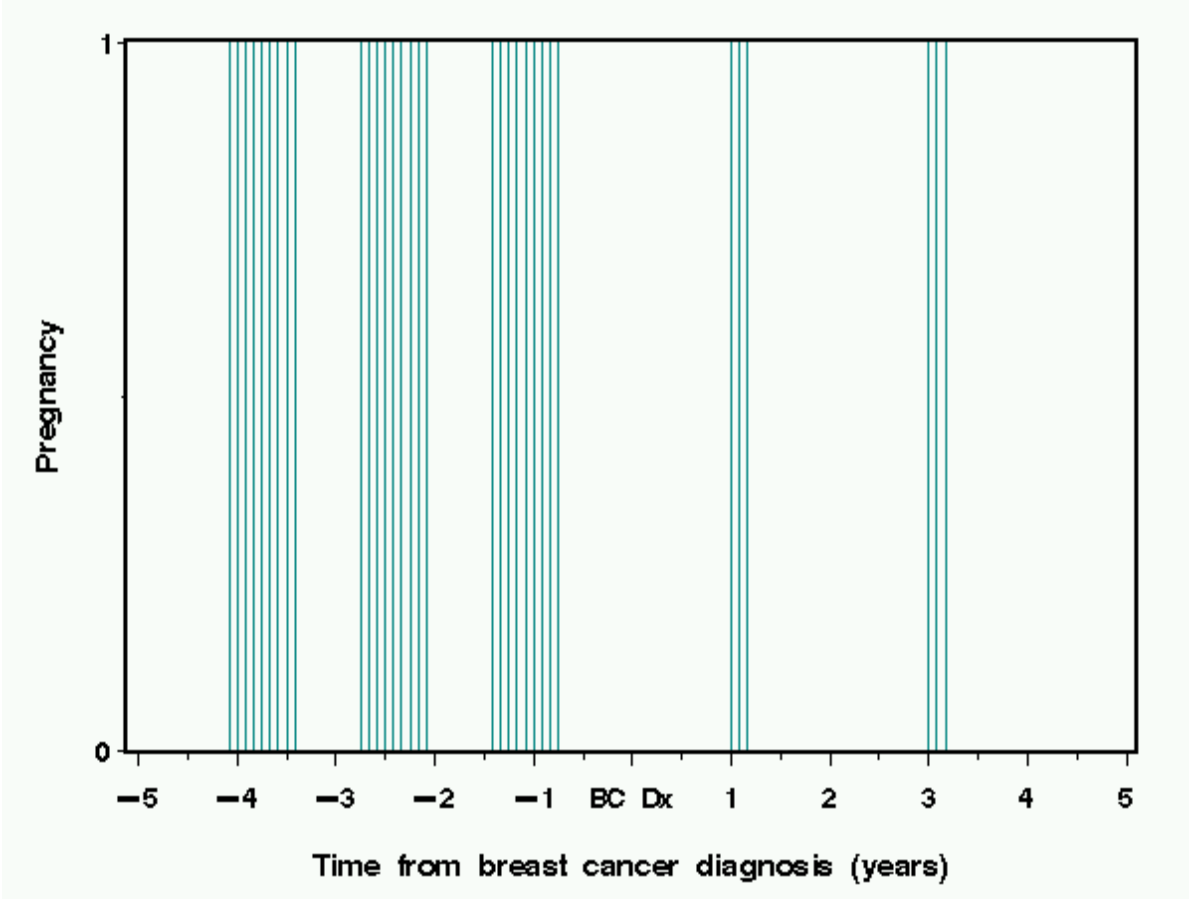

Abbreviations: BC Dx, breast cancer diagnosis.

<sup>a</sup> Each bar represents one month of pregnancy. Three bars represent an abortion, and nine bars represent a live-birth or a stillbirth.

**eFigure 2. Exposure Groups**

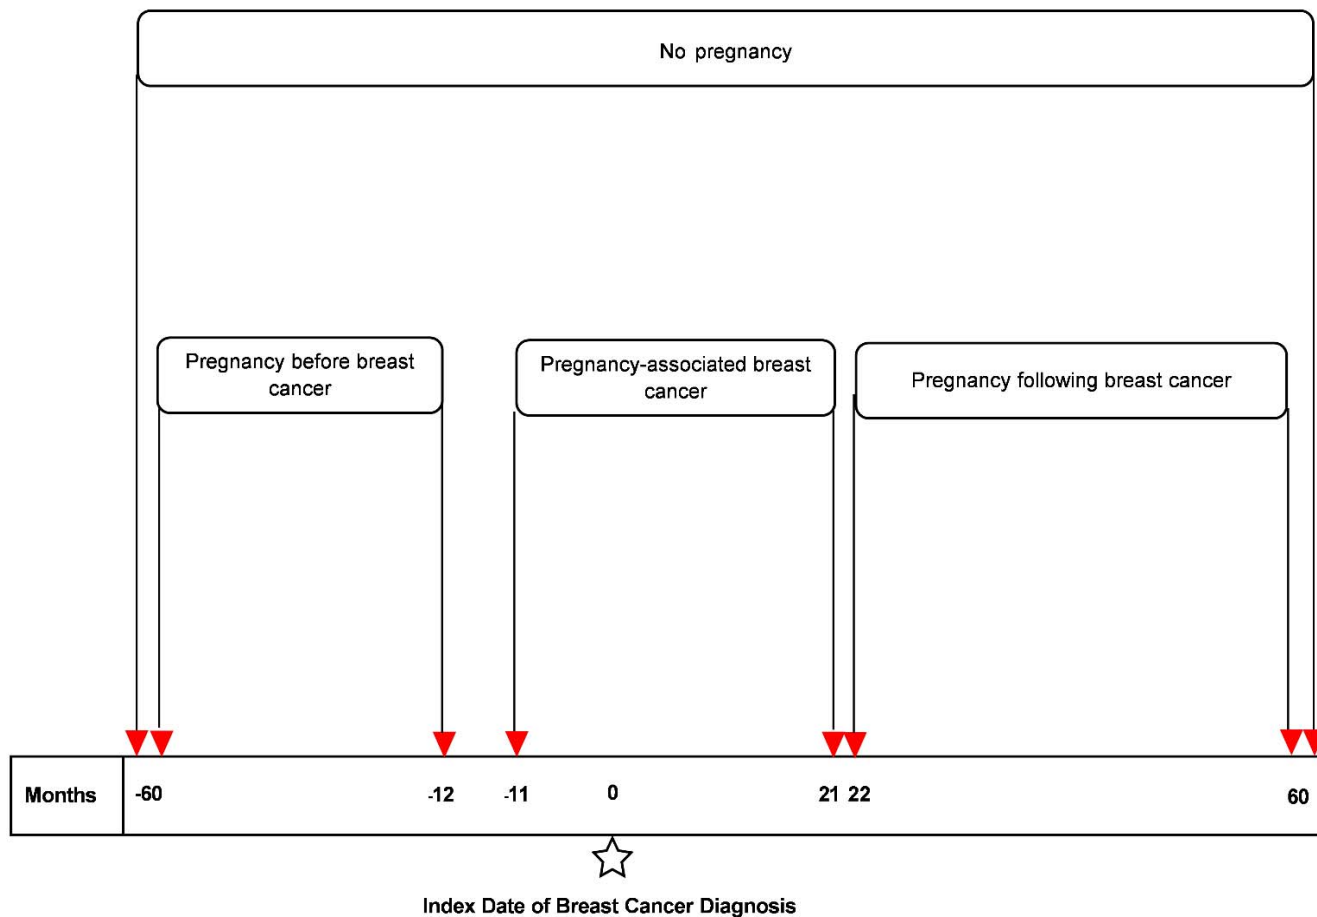

Definitions of exposure groups:

*No pregnancy:* no conception from 5 years prior to, until 5 years after, the index date of breast cancer diagnosis;

*Pregnancy before breast cancer:* conception in the interval 60 months to 12 months prior to the index date of breast cancer diagnosis;

*Pregnancy-associated breast cancer:* conception in the interval 11 months prior to, until 21 months after, the index date of breast cancer diagnosis;

*Pregnancy following breast cancer:* conception in the interval 22 months to 60 months after the index date of breast cancer diagnosis.

**eFigure 3.** Prevalence of Pregnancy in 7,553 Women by the Time From Breast Cancer Diagnosis

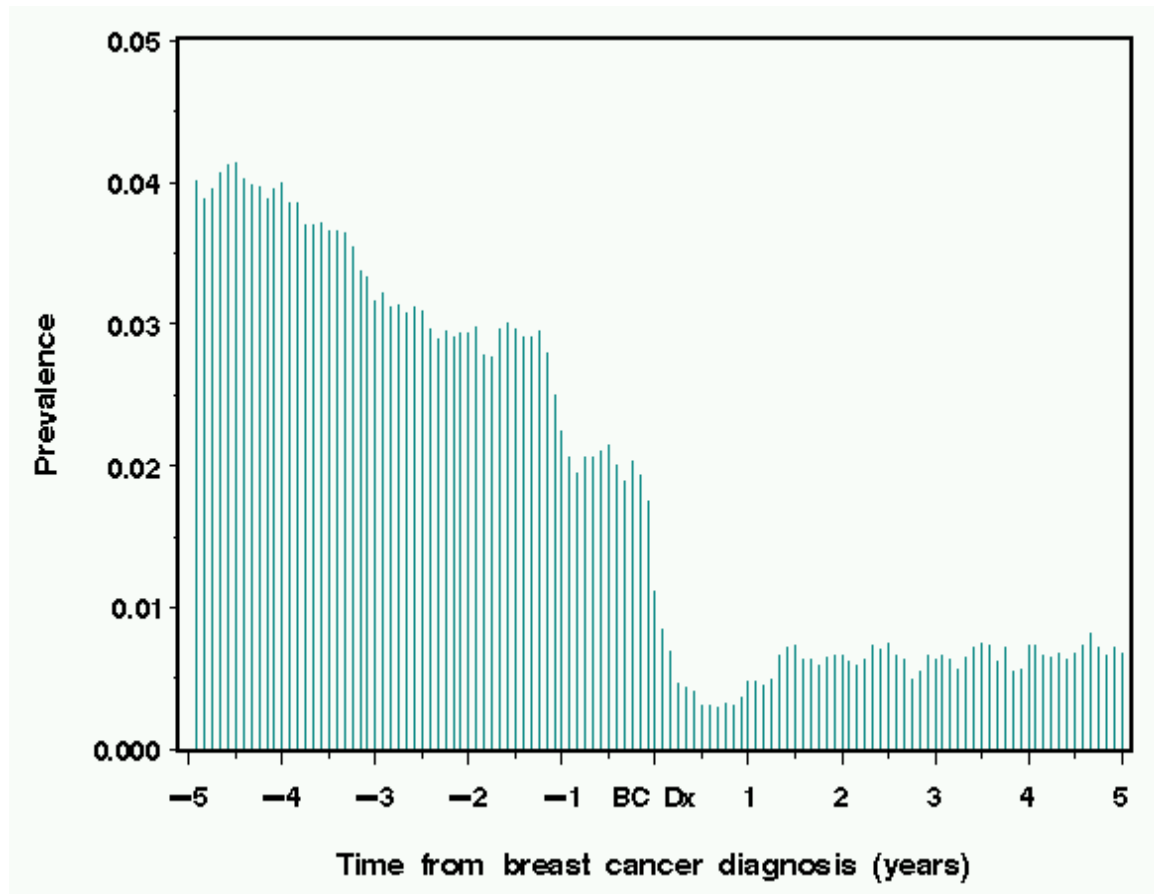

Abbreviations: BC Dx represents 'Breast Cancer Diagnosis.'

**eFigure 4.** Prevalence of Abortion in 7,553 Women by the Time From Breast Cancer Diagnosis

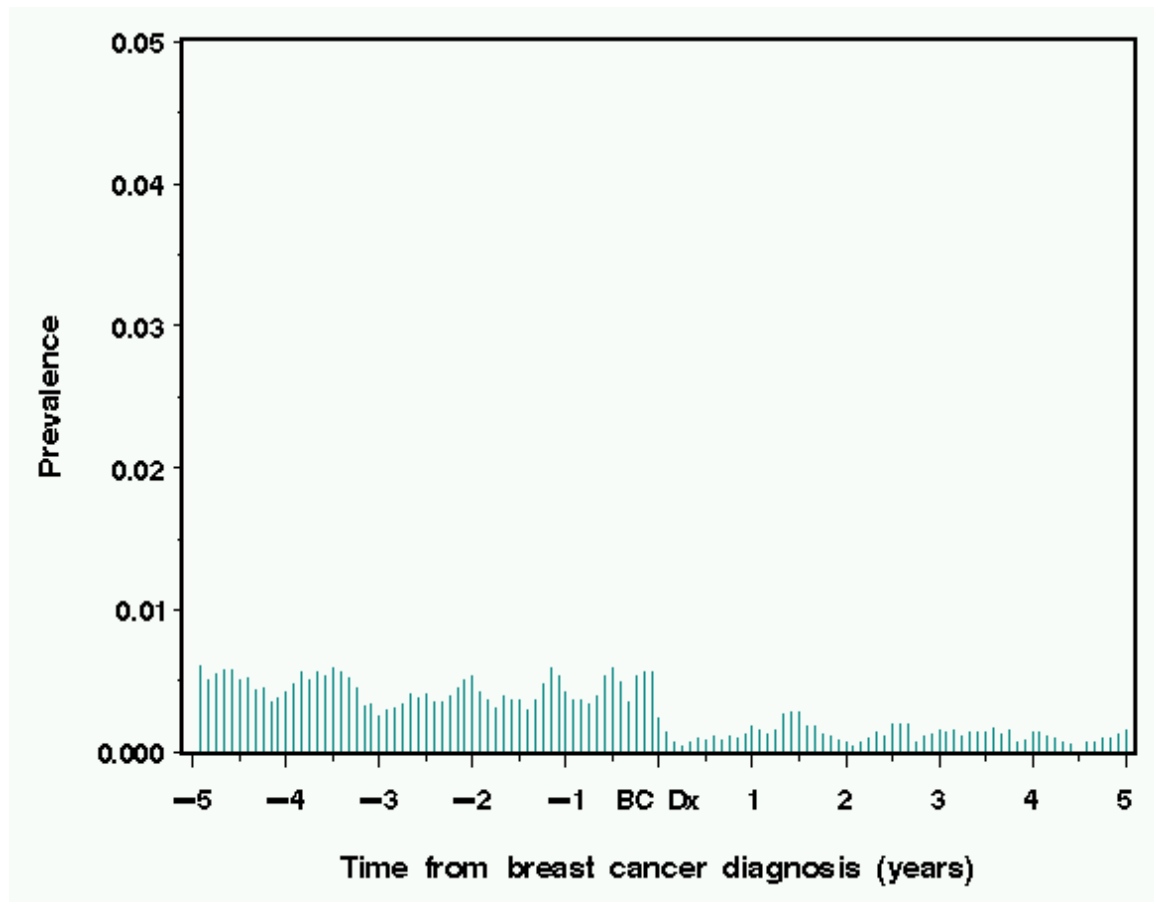

Abbreviations: BC Dx represents 'Breast Cancer Diagnosis.'

**eFigure 5.** Prevalence of Live Birth in 7,553 Women by the Time From Breast Cancer Diagnosis

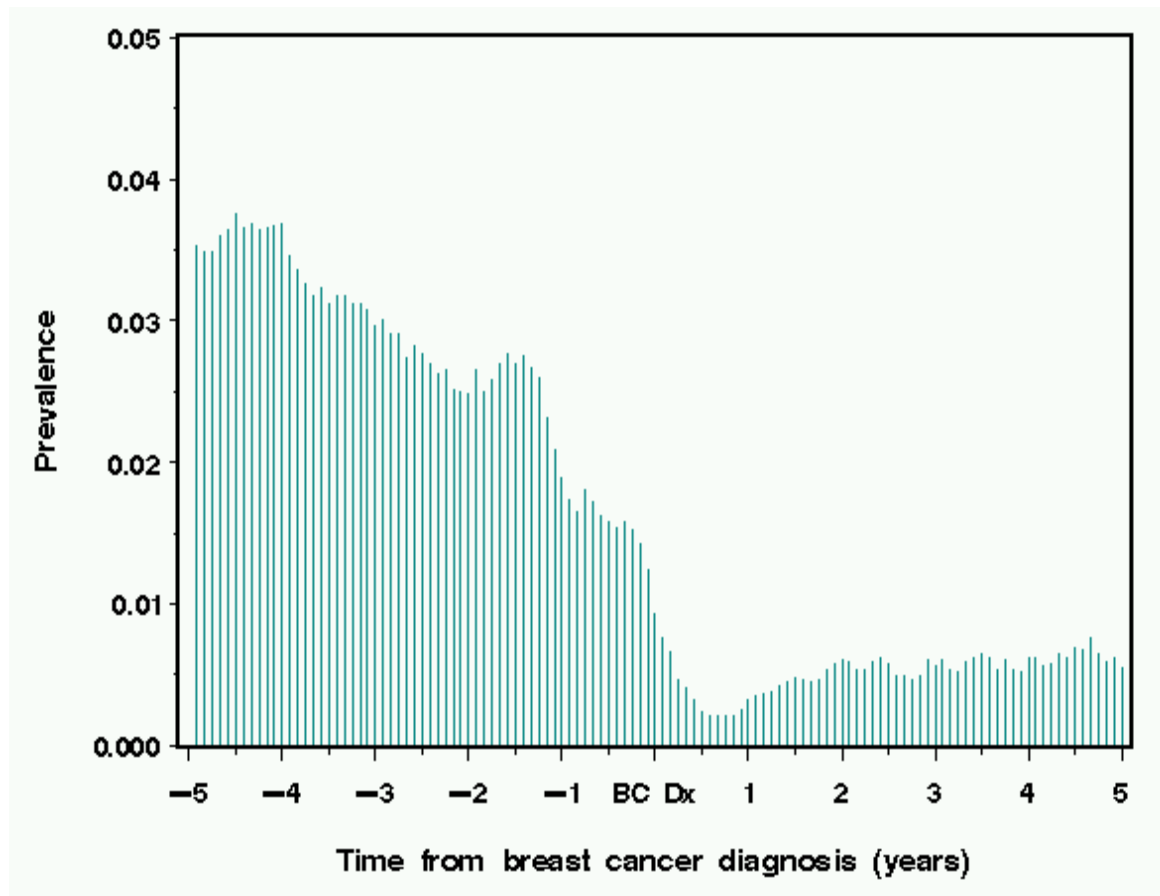

Abbreviations: BC Dx represents 'Breast Cancer Diagnosis.'

**eFigure 6.** Prevalence of Live Birth in 351 Women Age 20-29 Years by the Time From Breast Cancer Diagnosis

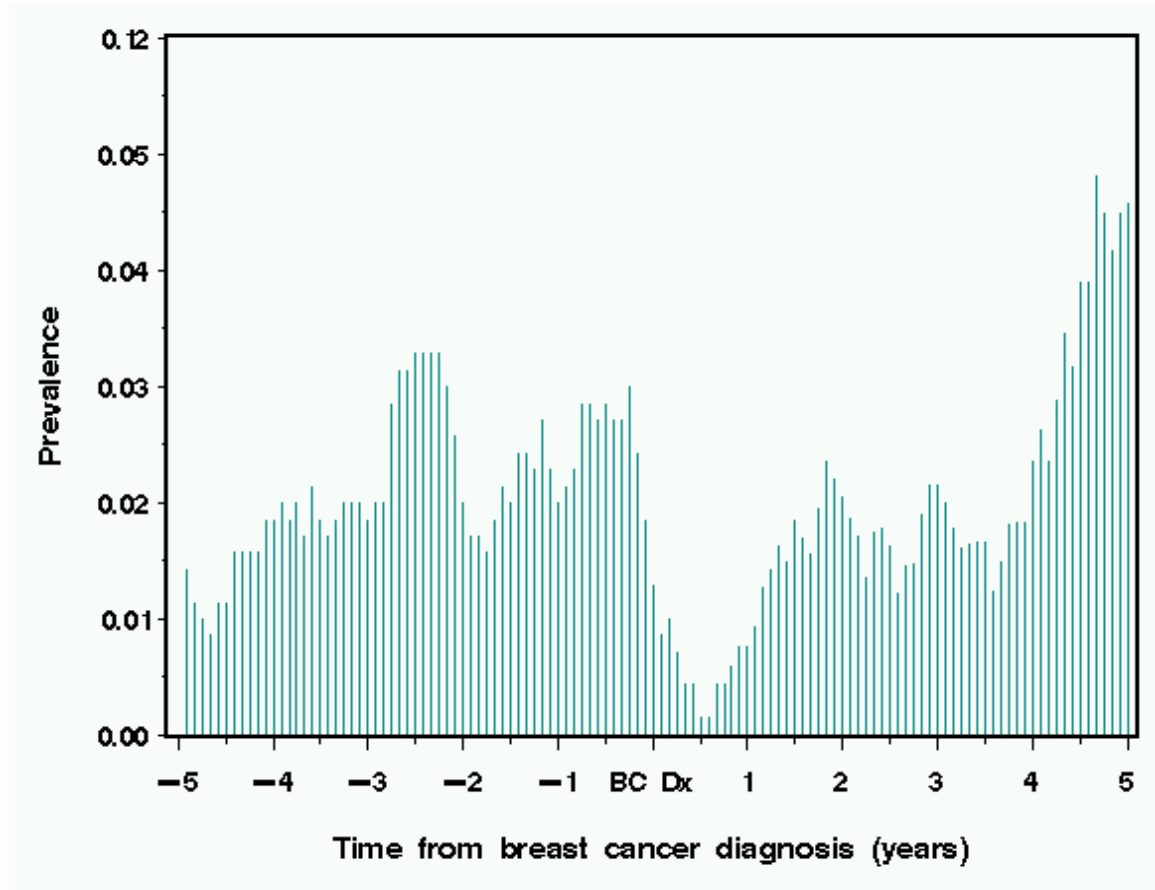

Abbreviations: BC Dx represents 'Breast Cancer Diagnosis.'



**eFigure 7.** Prevalence of Live Birth in 858 Women Age 30-34 Years by the Time From Breast Cancer Diagnosis

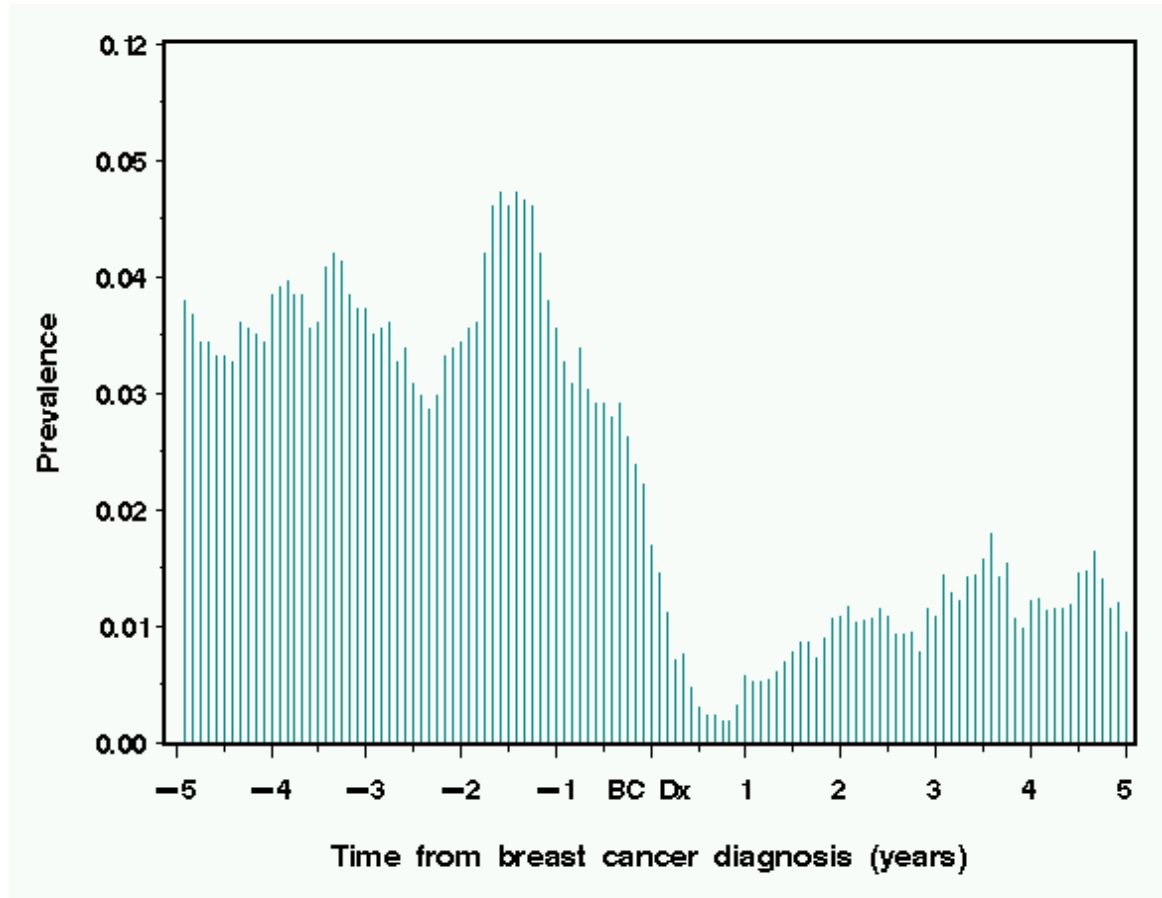

Abbreviations: BC Dx represents 'Breast Cancer Diagnosis.'

**eFigure 8.** Prevalence of Live Birth in 1,992 Women Age 35-39 Years by the Time From Breast Cancer Diagnosis

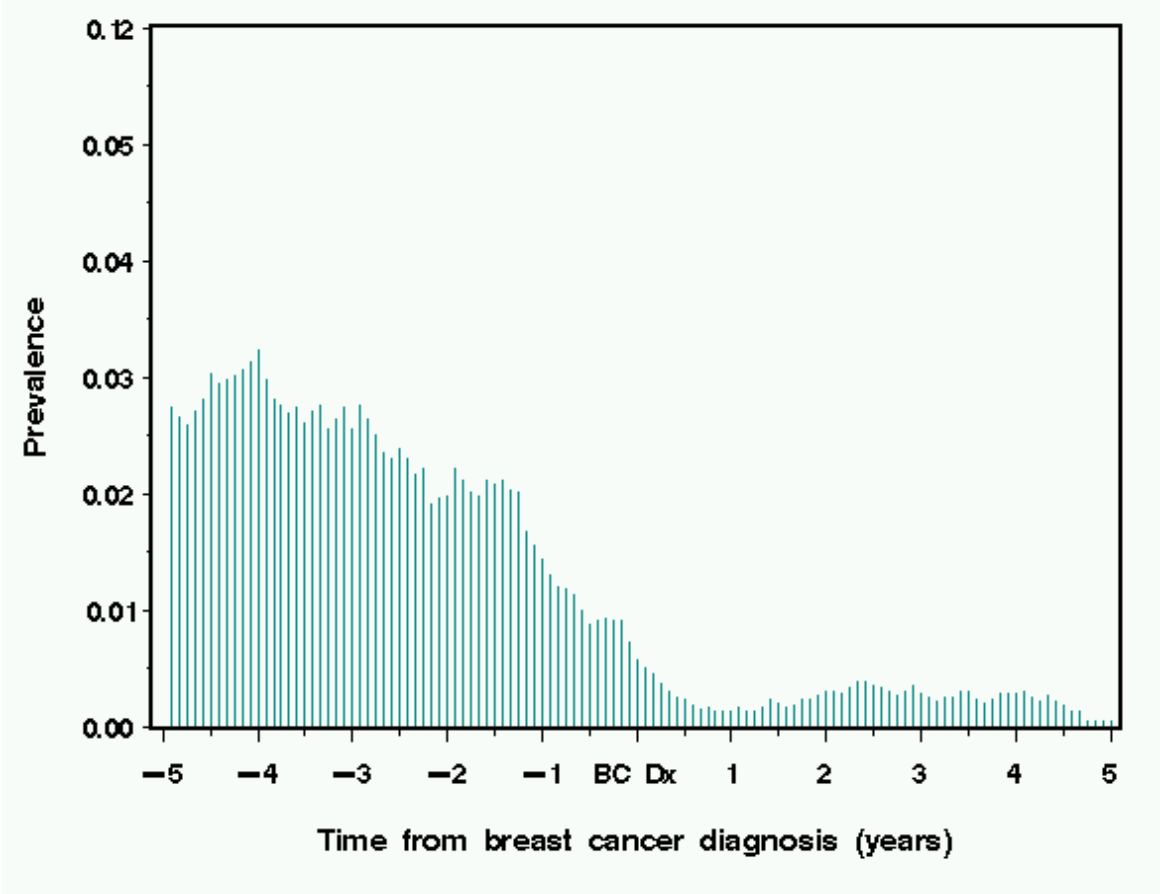

Abbreviations: BC Dx represents 'Breast Cancer Diagnosis.'

**eFigure 9.** Prevalence of Live Birth in 4,352 Women Age 40-44 Years by the Time From Breast Cancer Diagnosis

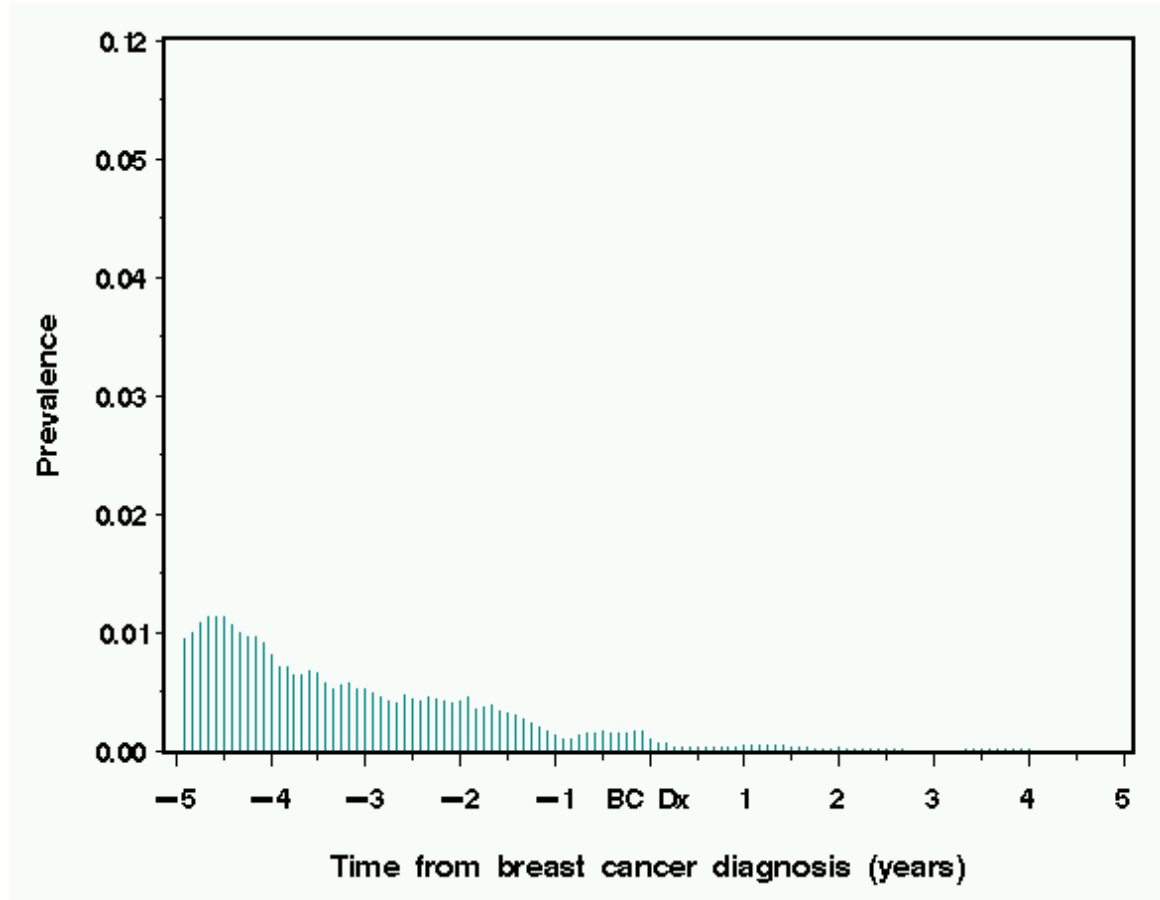

Abbreviations: BC Dx represents 'Breast Cancer Diagnosis.'

**eFigure 10.** Number of Women at Risk of Death From All Causes in 7,553 Patients by the Time From Breast Cancer Diagnosis

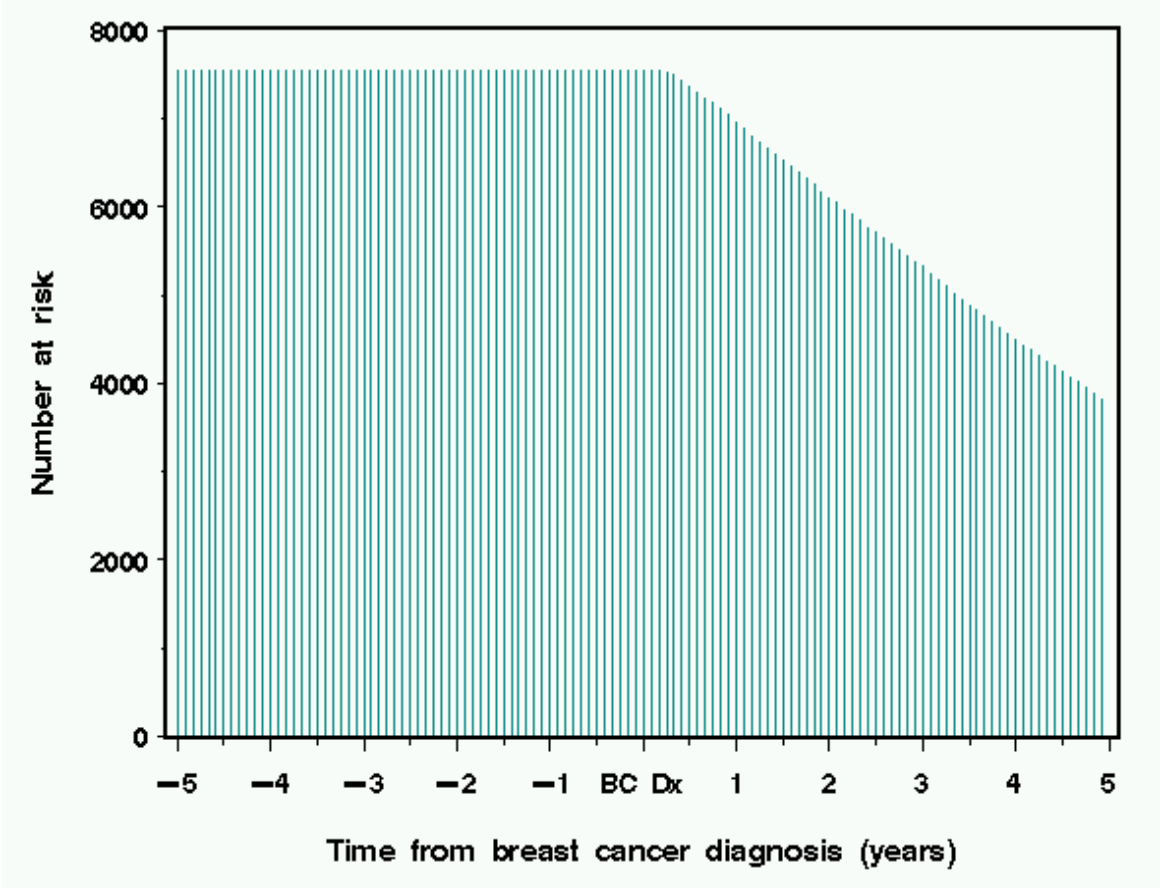

Abbreviations: BC Dx represents 'Breast Cancer Diagnosis.'

**eFigure 11.** 5-year Overall Survival in Women with Pregnancy-Associated Breast Cancer According to Age Groups at Diagnosis; Unadjusted <sup>a</sup>

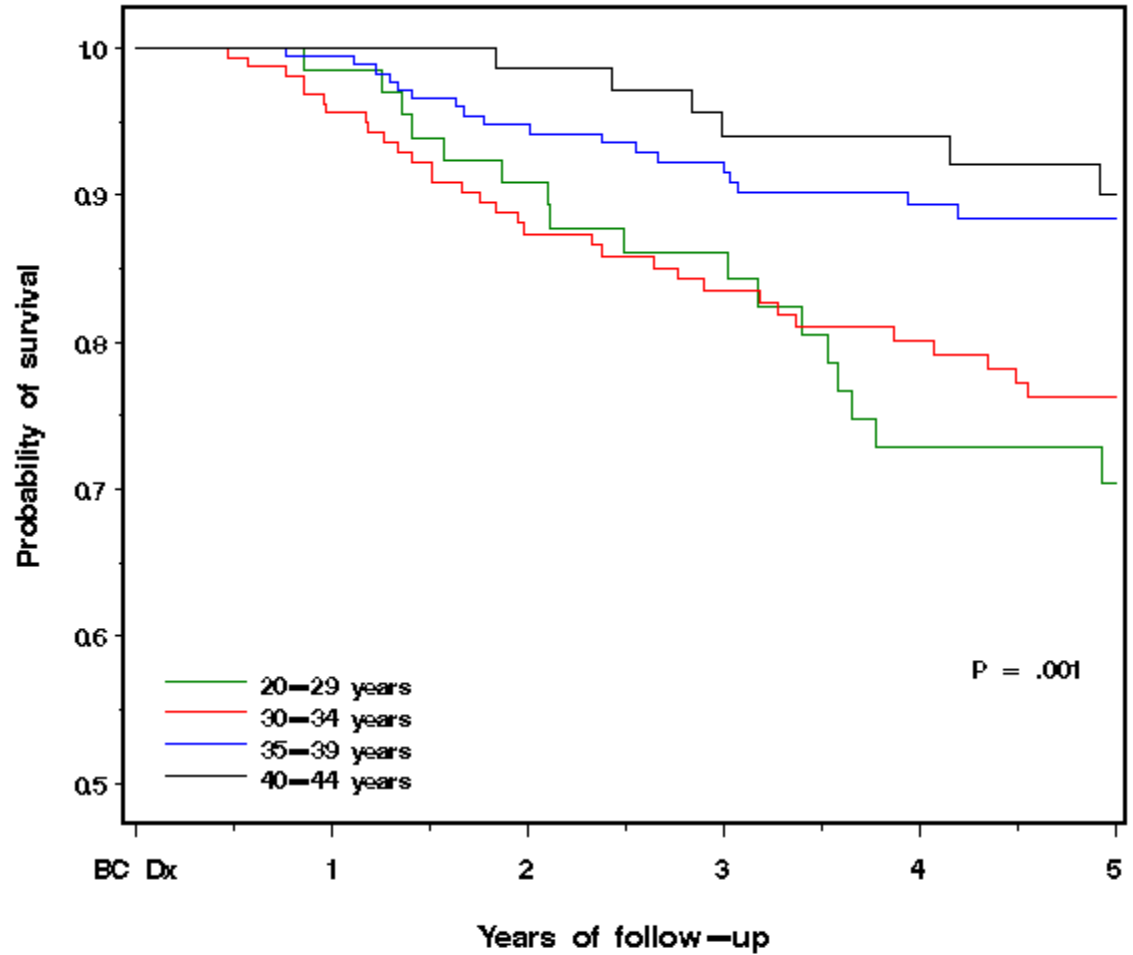

**Numbers at risk**

|                 | BC Dx | 1   | 2   | 3   | 4   | 5  |
|-----------------|-------|-----|-----|-----|-----|----|
| Age 20-29 years | 66    | 65  | 59  | 47  | 34  | 29 |
| Age 30-34 years | 168   | 148 | 118 | 103 | 90  | 71 |
| Age 35-39 years | 184   | 176 | 157 | 133 | 111 | 89 |
| Age 40-44 years | 83    | 78  | 70  | 59  | 53  | 42 |

Abbreviations: BC Dx represents 'Breast Cancer Diagnosis.'

<sup>a</sup> Definition of pregnancy-associated breast cancer: conception in the interval 11 months prior to, until 21 months after, the index date of breast cancer diagnosis.
